# Supplementary material for: Nurses’ worry or concern and early recognition of deteriorating patients on general wards in acute care hospitals: a systematic review
Source: Springer Nature journal article supplement (doi:10.1186/s13054-015-0950-5), 2015-05-19
Supplement: MOESM1 [file 9780510]

**Additional file 1****In- and exclusion criteria**

|                    |                                                                                                                                                                                           |
|--------------------|-------------------------------------------------------------------------------------------------------------------------------------------------------------------------------------------|
| Inclusion criteria | Original studies, all designs and languages                                                                                                                                               |
|                    | Studies performed in general wards in acute care hospitals                                                                                                                                |
|                    | Studies concerning adult patients (age 18 years and older)                                                                                                                                |
|                    | Studies that address 'worry/concern' of nurses in the process of recognition of deterioration in patients                                                                                 |
|                    | Studies that address 'worry/concern' of nurses, preceding the calling for assistance/activation of the RRT                                                                                |
|                    | Full-text was available                                                                                                                                                                   |
| Exclusion criteria | Studies that focused solely on specialized wards such as Emergency Department, Intensive Care Unit, Medium Care Unit, Obstetrics ward, Operating Room, Paediatric wards, Psychiatry wards |
|                    | Studies concerning homecare                                                                                                                                                               |
|                    | Studies of low methodological quality                                                                                                                                                     |
