# Supplementary material for: Nurses’ worry or concern and early recognition of deteriorating patients on general wards in acute care hospitals: a systematic review
Source: Springer Nature journal article supplement (doi:10.1186/s13054-015-0950-5), 2015-05-19
Supplement: MOESM3 [file 9780510]

## Additional file 3 Study characteristics

| Author                     | Design                                                                                                               | Aim                                                                                                                                                      | Data collection                                                                 | Sample                                                           | Setting                                                                                                                                         | RRS                                                                             | Outcome measures used                              |
|----------------------------|----------------------------------------------------------------------------------------------------------------------|----------------------------------------------------------------------------------------------------------------------------------------------------------|---------------------------------------------------------------------------------|------------------------------------------------------------------|-------------------------------------------------------------------------------------------------------------------------------------------------|---------------------------------------------------------------------------------|----------------------------------------------------|
| Andrews and Waterman, 2005 | Grounded theory<br>Theoretical sampling until saturation                                                             | Investigate difficulties ward staff experienced in detecting deterioration and how it is resolved                                                        | Interviews (open ended questions)<br>Participant and nonparticipant observation | 30 Nurses, 7 doctors, 7 healthcare support workers               | 1 surgical and 1 general medical ward<br>University teaching hospital (UK)                                                                      | Type RRT: outreach<br>Aggregated scoring system<br>No "worry/concern" criterion | Signs and symptoms of recognition of deterioration |
| Boniatti et al. 2010       | Observational<br>Cross-sectional                                                                                     | Describe reasons for RRS activation and verify association of calling criteria with 30 day mortality                                                     | Review<br>registration of RRS-calls                                             | 1051 RRS-calls for 901 patients during January 2007 to June 2008 | Type of ward: not specified<br>794 bed university-affiliated hospital (Brasil)                                                                  | Type RRT: MET<br>Single-parameter system<br>Criterion "worry/concern" included  | Analysis "worry/concern" criterion                 |
| Cioffi et al. 2009         | Exploratory<br>descriptive<br>Purposive and snowball sampling<br>Analysis procedures according to Klein et al.1989   | Identify cues of potential early clinical deterioration used to recognise a patient of concern who is not meeting the current objective calling criteria | Interviews; recall of incident, use of probes                                   | 17 Nurses                                                        | 12 medical , 2 surgical, 3 HDP units<br>2 tertiary referral hospitals and 2 metropolitan hospitals (Australia)                                  | Not reported                                                                    | Signs and symptoms of recognition of deterioration |
| Cioffi 2000                | Exploratory<br>Descriptive<br>Purposive sample                                                                       | Explore patient characteristics and process of recognition nurses when worried.                                                                          | Unstructured interviews, describing an experience                               | 32 Nurses > 5 years experience, high RRS users                   | Surgical, renal, gynaecological, CCU, orthopedics, with high numbers of RRS calls.<br>A teaching hospital and a peripheral hospital (Australia) | Type RRT: MET<br>Single-parameter system<br>Criterion "worry/concern" included  | Signs and symptoms of recognition of deterioration |
| Cox et al. 2006            | Exploratory<br>Descriptive<br>Purposive sample<br>Content analysis                                                   | Explore factors that influence experiences of trained nurses caring for critically ill patients                                                          | Semi-structured interviews; recount an incident                                 | 7 Nurses<br>Experience: newly qualified to 20 years.             | 1 medical ward<br>District general hospital (UK)                                                                                                | Not reported                                                                    | Signs and symptoms of recognition of deterioration |
| Donaldson et al.2009       | Mixed-method qualitative part for review:<br>Descriptive<br>Convenience sample<br>Thematic analysis until saturation | Evaluate impact of RRT( from nurse perspective)                                                                                                          | Interviews; open-ended questions                                                | 56 Nurses                                                        | Acute care units<br>136 – 412 beds; 9 robust RRT adopter hospitals and 9 delayed RRT adopter hospitals (USA)                                    | Type RRT: RRTnurse led<br>Calling system not reported                           | Signs and symptoms of recognition of deterioration |
| Endacott et al. 2007       | Mixed-method qualitative part                                                                                        | Identify cues ward nurses/doctors use to                                                                                                                 | Semi-structured interviews                                                      | 14 Doctors and 11 nurses caring for 17 patients 24 hours before  | General wards<br>220 bed regional hospital                                                                                                      | Not reported                                                                    | Signs and symptoms of recognition of deterioration |

|                          |                                                                                                                                                            |                                                                                                                                                              |                                                                   |                                                                                                                                                                                                          |                                                                                                                                                                                          |                                                                                                                            |                                                       |
|--------------------------|------------------------------------------------------------------------------------------------------------------------------------------------------------|--------------------------------------------------------------------------------------------------------------------------------------------------------------|-------------------------------------------------------------------|----------------------------------------------------------------------------------------------------------------------------------------------------------------------------------------------------------|------------------------------------------------------------------------------------------------------------------------------------------------------------------------------------------|----------------------------------------------------------------------------------------------------------------------------|-------------------------------------------------------|
|                          | for review:<br>Descriptive<br>Purposive<br>sample<br>Content<br>analysis                                                                                   | identify patient<br>deterioration<br>Examine assessment<br>and communication of<br>deterioration in patients<br>on acute wards                               |                                                                   | unexpected ICU admission                                                                                                                                                                                 | (Australia)                                                                                                                                                                              |                                                                                                                            |                                                       |
| Gazarion et al.<br>2010  | Descriptive<br>Purposive<br>sampling until<br>saturation<br>Cognitive task                                                                                 | Describe cues and<br>factors employed by<br>nurses to identify and<br>interrupt a potential<br>preventable CPA                                               | Interviews                                                        | 13 Nurses (10 RN's , 1 Nurse in<br>Charge, 2 staff nurses unit<br>perceptors) caring for patients who<br>had experienced a prearrest period)                                                             | 4 medical wards<br>747 bed academic medical center<br>(USA)                                                                                                                              | Not reported                                                                                                               | Signs and symptoms of<br>recognition of deterioration |
| Hourihan et al.<br>1995  | Observational<br>Descriptive<br>prospective<br>cohort                                                                                                      | Describe utilisation of<br>RRS after<br>implementation                                                                                                       | Registration of<br>RRS-calls                                      | 294 RRS-calls from April - October<br>1994                                                                                                                                                               | All wards, 460 bed university teaching<br>hospital<br>(Australia)                                                                                                                        | Type RRT: MET<br>Single-parameter system<br>Criterion "worry/concern"<br>included                                          | Analysis of RRS calls                                 |
| Laurens &<br>Dwyer, 2010 | Quasi-<br>experimental,<br>Before and after<br>study                                                                                                       | Determine effect RRS<br>implementation on<br>mortality rates,<br>cardiopulmonary<br>arrests, and ICU-<br>admissions                                          | Retrospective<br>patient files<br>Prospective RRS<br>registration | 105 activations of cardiac arrest team<br>pre-intervention period<br>296 RRS activations                                                                                                                 | All wards, 150 bed regional teaching<br>hospital<br>(Australia)                                                                                                                          | Type RRT: MET<br>Single-parameter system<br>Criterion "worry/concern"<br>included                                          | Analysis "worry/concern"<br>criterion                 |
| Leach et al.<br>2010     | Grounded<br>theory<br>Purposive<br>sampling<br>Open coding,<br>constant<br>comparison and<br>contrasting                                                   | Investigate how RNs<br>rescue patients in<br>hospitals with RRT                                                                                              | Semi-structured<br>interviews                                     | 50 Nurses involved with RRT's (14<br>bedside staff RNs who had called<br>RRTs, 16 RRT staff RNs, 2 respiratory<br>therapists who had responded to<br>RRTs, 8 nurse supervisors who had<br>observed RRTs) | Type of ward: not mentioned<br>6 acute care hospitals (non-profit<br>community, magnet-designated, public,<br>academic, for-profit community and<br>integrated delivery system)<br>(USA) | Type RRT: RRT<br>Calling system not reported;                                                                              | Signs and symptoms of<br>recognition of deterioration |
| Massey et al.<br>2013    | Interpretive<br>qualitative<br>approach<br>Transcribed<br>verbatim and<br>thematic<br>analysis                                                             | Explore nurses'<br>experiences and<br>perceptions of using<br>and activating a RRS                                                                           | In-depths semi-<br>structured<br>interviews.                      | 15 Registered ward nurses                                                                                                                                                                                | General wards.<br>Large public teaching hospital<br>(Australia)                                                                                                                          | Type RRT: MET<br>Single-parameter system<br>Not specifically mentioned<br>whether 'worry/concern' was<br>calling criterion | Signs and symptoms of<br>recognition of deterioration |
| McDonnell et<br>al. 2012 | Mixed-method<br>qualitative part<br>for review:<br>Descriptive<br>Purposive<br>sampling<br>Thematic<br>framework<br>analysis<br>(Ritchie/Spence<br>r 1994) | Evaluate impact of new<br>T&T and observation<br>charts on the<br>knowledge and<br>confidence of nurses to<br>recognize and manage<br>deteriorating patients | Semi structured<br>interviews                                     | 15 Registered nurses                                                                                                                                                                                     | Type of ward: surgical, orthopaedic, acute<br>medicine, Medicine<br>District general hospital > 500 beds<br>(UK)                                                                         | Type RRT: outreach<br>Aggregated scoring system<br>No "worry/concern" criterion.                                           | Signs and symptoms of<br>recognition of deterioration |
| Minick                   | Interpretative                                                                                                                                             | Describe phenomenon                                                                                                                                          | In-depths group                                                   | 14 Nurses                                                                                                                                                                                                | Orthopaedics, neurology, renal, oncology,                                                                                                                                                | Not reported                                                                                                               | Signs and symptoms of                                 |

|                             |                                                                                                                                     |                                                                                                                                                |                                               |                                                                |                                                                                                                                                   |                                                                                                                                    |                                                       |
|-----------------------------|-------------------------------------------------------------------------------------------------------------------------------------|------------------------------------------------------------------------------------------------------------------------------------------------|-----------------------------------------------|----------------------------------------------------------------|---------------------------------------------------------------------------------------------------------------------------------------------------|------------------------------------------------------------------------------------------------------------------------------------|-------------------------------------------------------|
| andHarvey<br>2003           | Phenomenology<br>Purposive<br>sampling                                                                                              | of early problem<br>recognition among<br>medical-surgical nurses                                                                               | interviews,<br>describing an<br>experience    |                                                                | cardiac, or pulmonary ward<br>Urban hospital<br>(USA)                                                                                             |                                                                                                                                    | recognition of deterioration                          |
| Parr et al.<br>2001         | Observational<br>Cross-sectional                                                                                                    | Describe reasons for,<br>and immediate<br>outcome following RRS<br>activation                                                                  | Review<br>registration of<br>RRS-calls        | 713 RRS- calls concerning 559<br>patients during the year 1998 | Wards not specified, ED excluded<br>580 bed tertiary teaching university-<br>affiliated hospital<br>(Australia)                                   | Type RRT: MET<br>Single-parameter system<br>Criterion "worry/concern"<br>included                                                  | Analysis of "worry/concern"<br>RRS-calls              |
| Pattison &<br>Eastham, 2011 | Mixed-method<br>qualitative part<br>for review:<br>Explanatory<br>Theoretical<br>sampling<br>Using grounded<br>theory<br>principles | Explore referrals<br>(characteristics) to<br>CriticalCareOutreachTe<br>am(CCOT)                                                                | In-depts<br>interviews, loosely<br>structured | 7 nurses and 2 doctors                                         | Patients with cancer referred to CCOT.<br>Specialist hospital over an 8 months period<br>(UK)                                                     | Type RRT: outreach<br>Aggregated scoring system<br>Not specifically mentioned<br>whether 'worry/concern' was<br>calling criterion. | Signs and symptoms of<br>recognition of deterioration |
| Santiano et al.<br>2009     | Observational<br>Cross-sectional                                                                                                    | Explore reasons nurses<br>use subjective 'worried'<br>calling criterion.<br>Compare outcomes of<br>worried with calls on<br>objective criteria | Review<br>registration of<br>RRS-calls        | 3189 RRS calls during 2006                                     | Type of ward: not specified<br>6 acute care hospitals (tertiary referral<br>centre, major metropolitan, metropolitan<br>and rural)<br>(Australia) | Type RRT: MET<br>Single-parameter system<br>Criterion "worry/concern"<br>included                                                  | Analysis of "worry/concern"<br>RRS-calls              |
| Williams et al.<br>2011     | Descriptive<br>Convenience<br>sample<br>Content<br>analysis                                                                         | Clarify nurse<br>perceptions of RRT's                                                                                                          | Focus groups, 15<br>item topic guide          | 13 nurses                                                      | 156 bed community hospital<br>General wards<br>(USA)                                                                                              | Not reported                                                                                                                       | Signs and symptoms of<br>recognition of deterioration |
